# Supplementary material
Source: publisher figshare collection journal article supplement (https://gsajournals.figshare.com/ndownloader/files/14721107)
Supplement: Supplementary file 1 [file 14721107]

# Supplementary Data

**Table S1**: Estimated rejection rate (50,000 Monte Carlo Replicates) when the distal SNP was located in another chromosome (The simulation setting was the same as the one used to generate Figures 2 and 3, with the difference here that the proximal marker and the QTL were in one chromosome and the distal marker was in a randomly chosen position of a different chromosome).


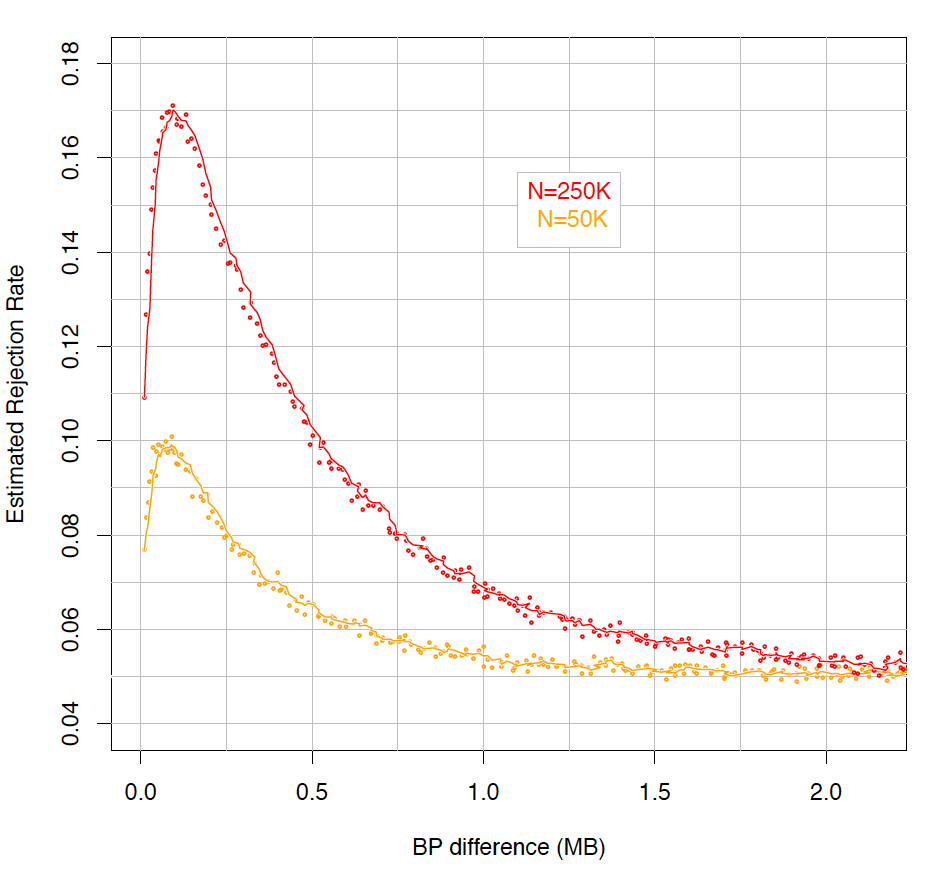


**Figure S1**. Empirical rejection rates versus physical distance between the proximal and distal marker by sample size. The simulation setting contained a single QTL () with an additive effect that explained 1% of the phenotypic variance and an infinitesimal additive effect that explained 49% of the variance. The infinitesimal effect was strictly additive with 500 randomly chosen loci each having IID effects from a normal distribution. The empirical model considered two SNPs with no causal effect. One of them (), was adjacent to the QTL and the other one () was placed at increasing distance from the pair (). Rejection of the null hypothesis (no interaction between and was conducted at a 0.05 significance level. Empirical rejection rates above 0.05 are indicative of phantom epistasis.


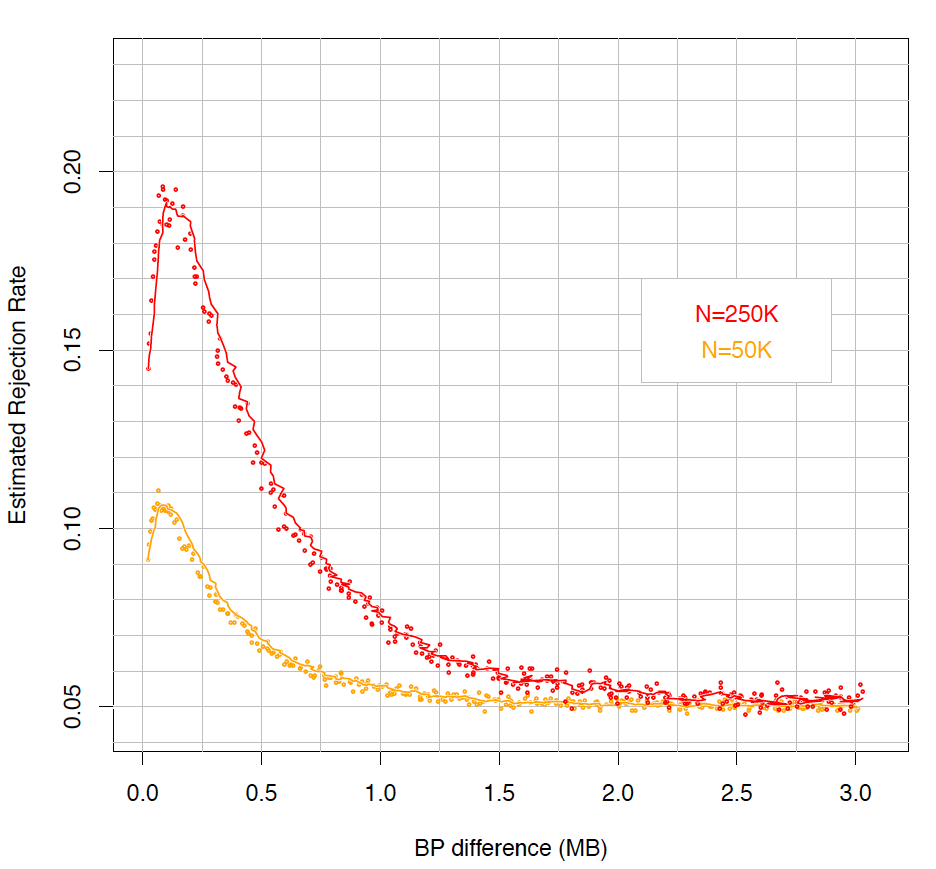


**Figure S2**. Empirical rejection rates versus physical distance between the proximal and distal marker. In the simulation, there were three marker-QTL pairs: (), () and (). Each QTL explained 1/300 of the phenotypic variance, all had additive effects. The empirical model considered two SNPs ( and ) with no causal effect. Rejection of the null hypothesis (no interaction between and was conducted at a 0.05 significance level. Empirical rejection rates above 0.05 are indicative of phantom epistasis.


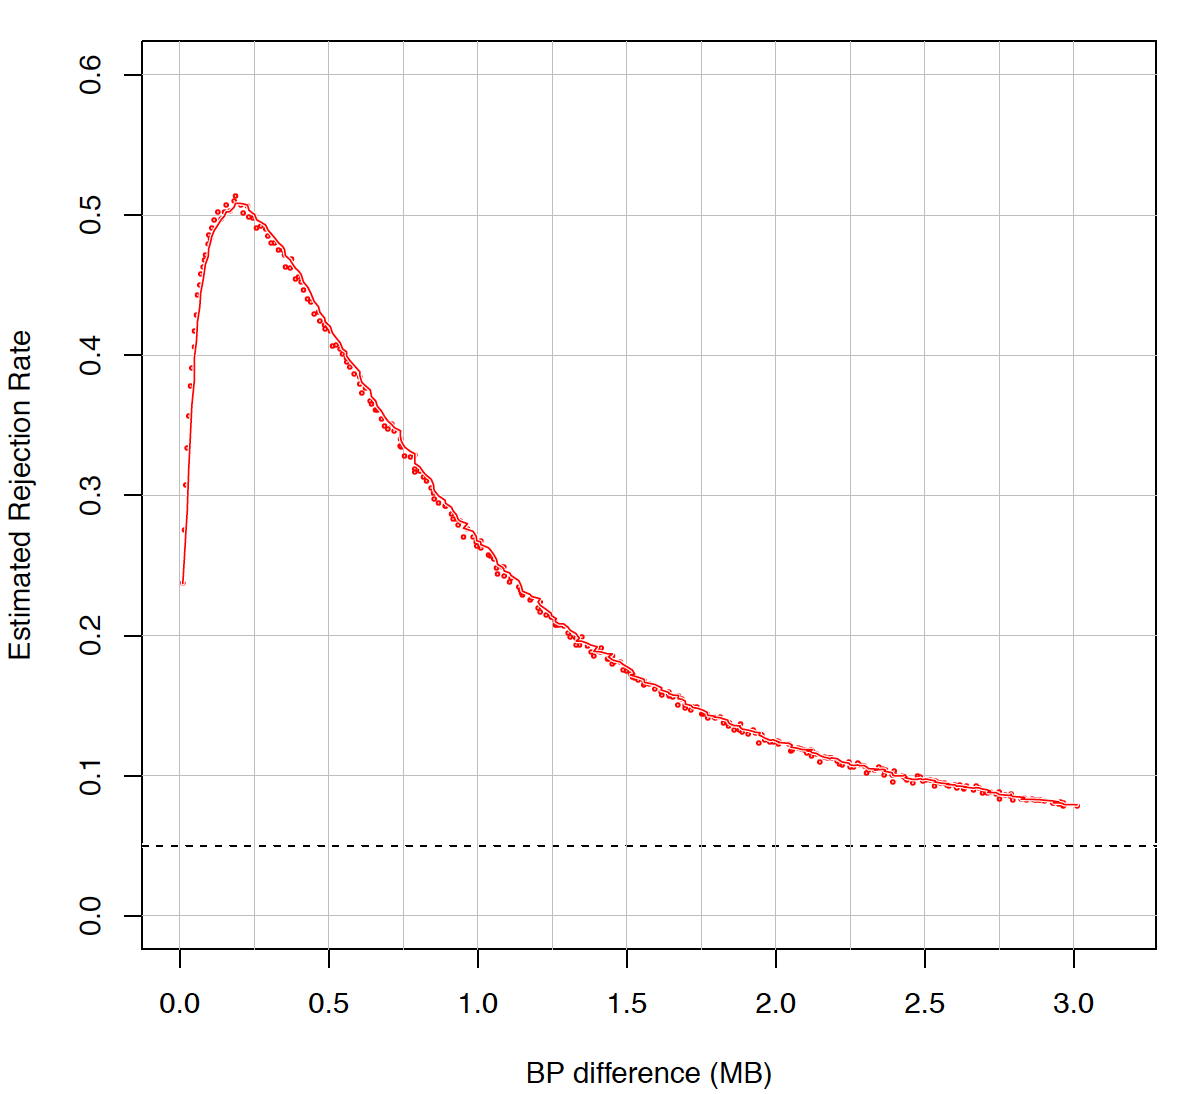


**Figure S3**. Empirical rejection rates for N=250K versus physical distance between the proximal and distal marker. The simulation setting used to obtain the results in the figure were as those used to generate Figures 2 and 3 (single QTL with strictly additive effects) with the difference that the QTL in this setting explained 50% of the phenotypic variance. The empirical model considered two SNPs with no causal effect. One of them (), was adjacent to the QTL and the other one () was placed at increasing distance from the pair (). Rejection of the null hypothesis (no interaction between and was conducted at a 0.05 significance level. Empirical rejection rates above 0.05 are indicative of phantom epistasis.
